# Supplementary material
Source: publisher figshare collection journal article supplement (https://sage.figshare.com/ndownloader/files/13095647)
Supplement: Supplementary file 1 [file 13095647]

**Supplemental Figure 1:** Sample 5% and 25% added sugar diets, 2000 kcal/d

| 5%, “Low” Added Sugar (LAS) Diet       |          |  | 25%, “High” Added Sugar (HAS) Diet               |          |  |
|----------------------------------------|----------|--|--------------------------------------------------|----------|--|
| Food                                   | Quantity |  | Food                                             | Quantity |  |
| <b>Breakfast</b>                       |          |  | <b>Breakfast</b>                                 |          |  |
| Oatmeal (quick cooking)                | 29 g     |  | Maple and brown sugar oatmeal (instant)          | 42 g     |  |
| Blueberries (from frozen, unsweetened) | 158 g    |  | Dried cranberries                                | 57 g     |  |
| Whole milk                             | 265 g    |  | Whole chocolate milk                             | 245 g    |  |
| Banana (fresh)                         | 120 g    |  |                                                  |          |  |
| <b>Morning Snack</b>                   |          |  | <b>Morning Snack</b>                             |          |  |
| String cheese (regular fat)            | 25 g     |  | String cheese (regular fat)                      | 28 g     |  |
| <b>Lunch</b>                           |          |  | <b>Lunch</b>                                     |          |  |
| PB&J Sandwich                          |          |  | PB&J Sandwich                                    |          |  |
| Peanut butter                          | 22 g     |  | Peanut butter                                    | 28 g     |  |
| Sugar-free jam                         | 15 g     |  | Reduced sugar jelly                              | 23 g     |  |
| White bread                            | 76 g     |  | White bread                                      | 86 g     |  |
| Baby carrots (fresh)                   | 70 g     |  | Baby carrots (fresh)                             | 80 g     |  |
| Ranch dressing (reduced calorie)       | 32 g     |  | Ranch dressing (reduced calorie)                 | 33 g     |  |
| Orange juice                           | 318 g    |  | Fruit-juice flavored drink                       | 258 g    |  |
| Fruit-juice flavored drink             | 72 g     |  |                                                  |          |  |
| <b>Afternoon Snack</b>                 |          |  | <b>Afternoon Snack</b>                           |          |  |
| Strawberries (fresh)                   | 200 g    |  | Granola bar (dark chocolate, peanut, and almond) | 35 g     |  |
| Granola bar (apple crisp)              | 21 g     |  |                                                  |          |  |
| <b>Dinner</b>                          |          |  | <b>Dinner</b>                                    |          |  |
| Chicken breast (baked)                 | 102 g    |  | Chicken breast (baked)                           | 102 g    |  |
| Barbecue sauce                         | 18 g     |  | Barbecue sauce                                   | 15 g     |  |
| Instant rice                           | 125 g    |  | Dinner roll (from frozen)                        | 28 g     |  |
| Butter (unsalted)                      | 18 g     |  | Butter (unsalted)                                | 12 g     |  |
| Green beans (steamed from frozen)      | 130 g    |  | Green beans (steamed from frozen)                | 120 g    |  |
| Iceberg lettuce                        | 90 g     |  | Iceberg lettuce                                  | 90 g     |  |
| Baby carrots (fresh)                   | 70 g     |  | Baby carrots (fresh)                             | 80 g     |  |

|                                     |                       |                                     |                       |
|-------------------------------------|-----------------------|-------------------------------------|-----------------------|
| Ranch dressing<br>(reduced calorie) | 32 g                  | Ranch dressing<br>(reduced calorie) | 35 g                  |
| <b>Extras</b>                       |                       | <b>Extras</b>                       |                       |
| Sucralose                           | 3 packets             | Sucralose                           | 3 packets             |
| Water (bottled,<br>spring)          | 3 x 16.9 fluid ounces | Water (bottled,<br>spring)          | 3 x 16.9 fluid ounces |
